# Supplementary material for: Utilizing an aggregate forming microenvironment sensitive coumarin–cholesterol conjugate as a sensor of pluronic organization and micro-polarity
Source: Royal Society of Chemistry journal article supplement (doi:10.1039/c5ra16549k), 2015-01-01
Supplement: c5ra16549k1.pdf [file c5ra16549k1.pdf]

## Supporting Information

### Utilizing an Aggregate Forming Microenvironment Sensitive Coumarin-Cholesterol Conjugate as a Sensor of Pluronic Organization and Micropolarity

Ivy Sarkar,<sup>a</sup> H. Surya Prakash Rao,<sup>b\*</sup> Avinash Desai,<sup>b</sup> Ashok Kumar Mishra<sup>a\*</sup>

<sup>a</sup> Department of Chemistry, Indian Institute of Technology Madras, Chennai – 600 036 INDIA

<sup>b</sup> Department of Chemistry, Pondicherry University, Pondicherry – 605 014 INDIA

Table S1: Few important parameters of P123 and F127.

| Trade name           | P123                                                    | F127                                                      |
|----------------------|---------------------------------------------------------|-----------------------------------------------------------|
| Formula              | PEO <sub>20</sub> -PPO <sub>70</sub> -PEO <sub>20</sub> | PEO <sub>100</sub> -PPO <sub>64</sub> -PEO <sub>100</sub> |
| Core size (Å)        | 42.1                                                    | 37.5                                                      |
| Corona thickness (Å) | 24.4                                                    | 70.2                                                      |
| HLB                  | 8                                                       | 22                                                        |

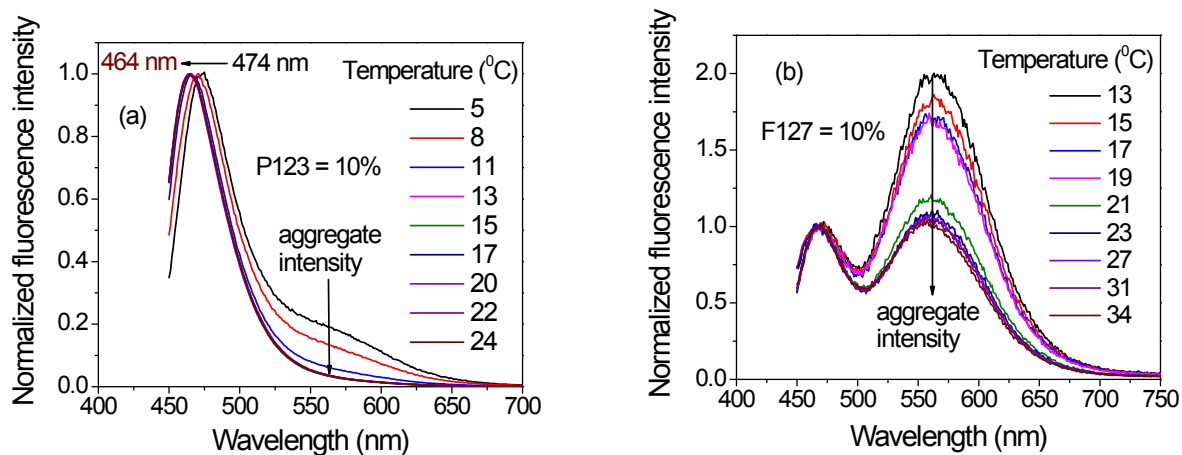

Figure S1: Normalized fluorescence spectra of Cum-Chl in presence of 10% (a) P123 and (b) F127 with increasing temperature; at  $\lambda_{\text{ex}}$  440 nm.

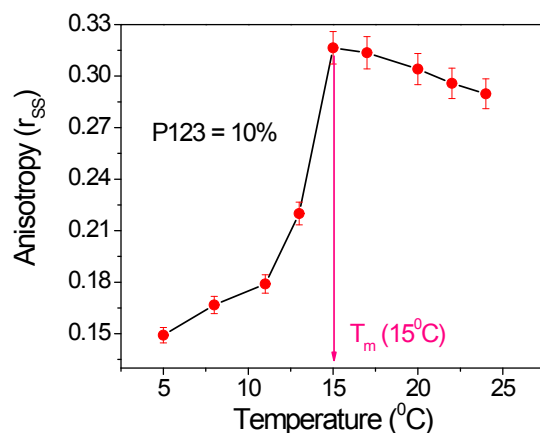

Figure S2: Variation of steady state fluorescence anisotropy ( $r_{SS}$ ) of Cum-Chl monomer in presence of 10% P123 with increasing temperature; at  $\lambda_{ex}$  440 nm.

Table S2: Fluorescence lifetime data of Cum-Chl monomer and aggregate form in presence of 10% P123 with increasing temperature, ( $\lambda_{ex} = 444$  nm,  $\lambda_{em} = 470$  nm for monomer and  $\lambda_{ex} = 444$  nm,  $\lambda_{em} = 566$  nm for aggregate).

| Temperature (°C) | $\tau_1$ (ns) ( $\beta_1$ ) | $\tau_2$ (ns) ( $\beta_2$ ) | $\tau_{aveg}$ (ns) | $\chi^2$ |           |
|------------------|-----------------------------|-----------------------------|--------------------|----------|-----------|
| 5                | 0.66 (0.89)                 | 2.03 (0.11)                 | 0.81               | 1.38     | Monomer   |
| 11               | 0.43 (0.78)                 | 2.05 (0.22)                 | 0.79               | 1.19     |           |
| 15               | 0.31 (0.57)                 | 2.59 (0.43)                 | 1.29               | 1.25     |           |
| 20               | 0.98 (0.44)                 | 2.66 (0.56)                 | 1.92               | 1.04     |           |
| 24               | 0.81 (0.48)                 | 2.61 (0.52)                 | 1.75               | 1.06     |           |
| 5                | 7.83 (0.53)                 | 26.46 (0.47)                | 16.59              | 1.22     | Aggregate |
| 11               | 4.87 (0.52)                 | 25.83 (0.48)                | 14.93              | 1.34     |           |
| 15               | 2.40 (0.92)                 | 19.10 (0.08)                | 3.74               | 1.17     |           |
| 20               | 2.11 (0.93)                 | 18.45 (0.07)                | 3.25               | 1.30     |           |
| 24               | 2.05 (0.93)                 | 17.87 (0.07)                | 3.16               | 1.33     |           |

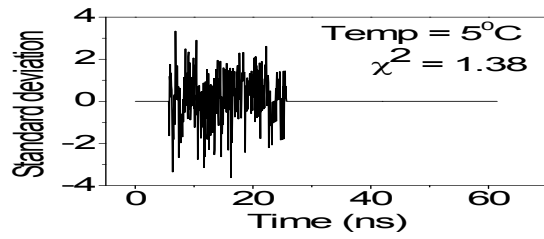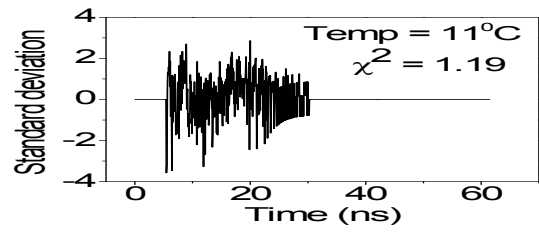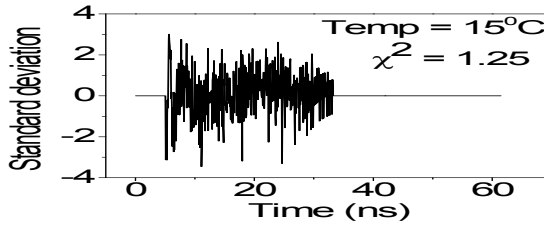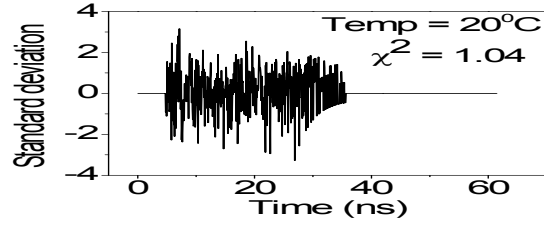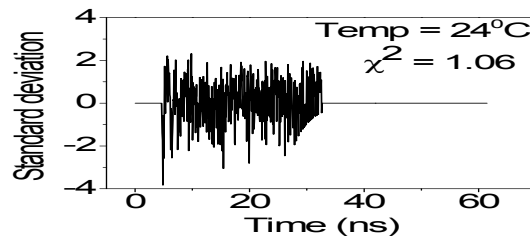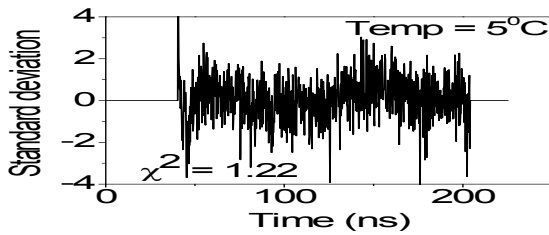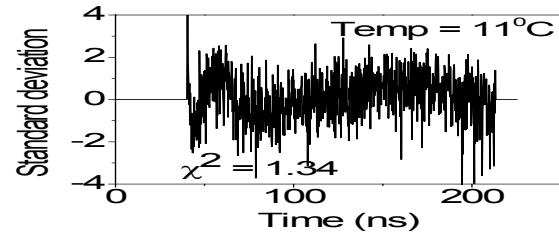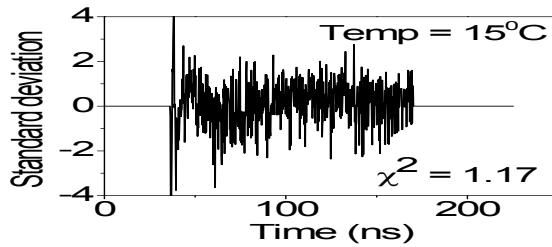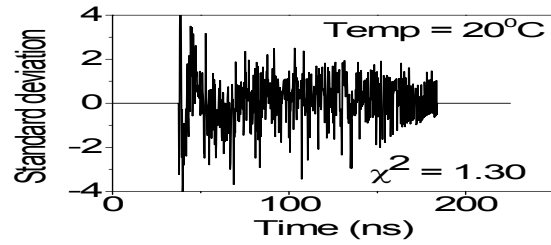

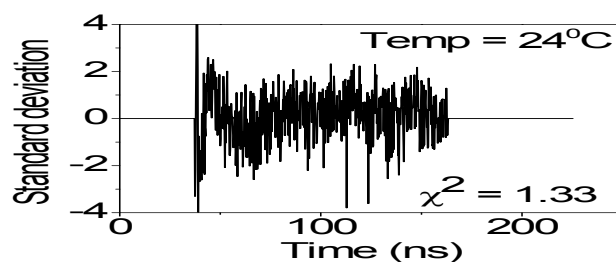

Figure S3: Residue distribution plots of Cum-Chl monomer and aggregate form in presence of 10% P123 with increasing temperature (corresponds to Table S2).

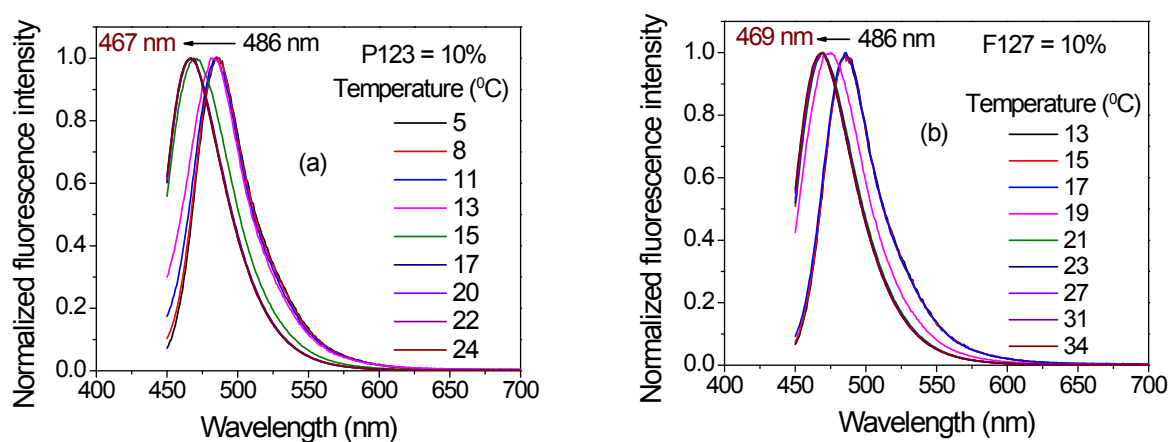

Figure S4: Normalized fluorescence spectra of Cum in presence of 10% (a) P123 and (b) F127 with increasing temperature; at  $\lambda_{\text{ex}}$  440 nm.

Table S3: Fluorescence lifetime data of Cum in presence of 10% P123 with increasing temperature ( $\lambda_{\text{ex}} = 444 \text{ nm}$ ,  $\lambda_{\text{em}} = 480 \text{ nm}$ ).

| Temperature ( $^{\circ}\text{C}$ ) | $\tau_1$ (ns) ( $\beta_1$ ) | $\tau_2$ (ns) ( $\beta_2$ ) | $\tau_{\text{aveg}}$ (ns) | $\chi^2$ |
|------------------------------------|-----------------------------|-----------------------------|---------------------------|----------|
| 5                                  | 0.18 (0.99)                 | 0.92 (0.01)                 | 0.19                      | 1.21     |
| 11                                 | 0.20 (0.99)                 | 1.87 (0.01)                 | 0.22                      | 1.01     |
| 15                                 | 0.21 (0.96)                 | 2.42 (0.04)                 | 0.30                      | 1.22     |
| 20                                 | 0.86 (0.63)                 | 2.56 (0.37)                 | 1.50                      | 1.01     |
| 24                                 | 0.83 (0.63)                 | 2.51 (0.37)                 | 1.45                      | 1.08     |

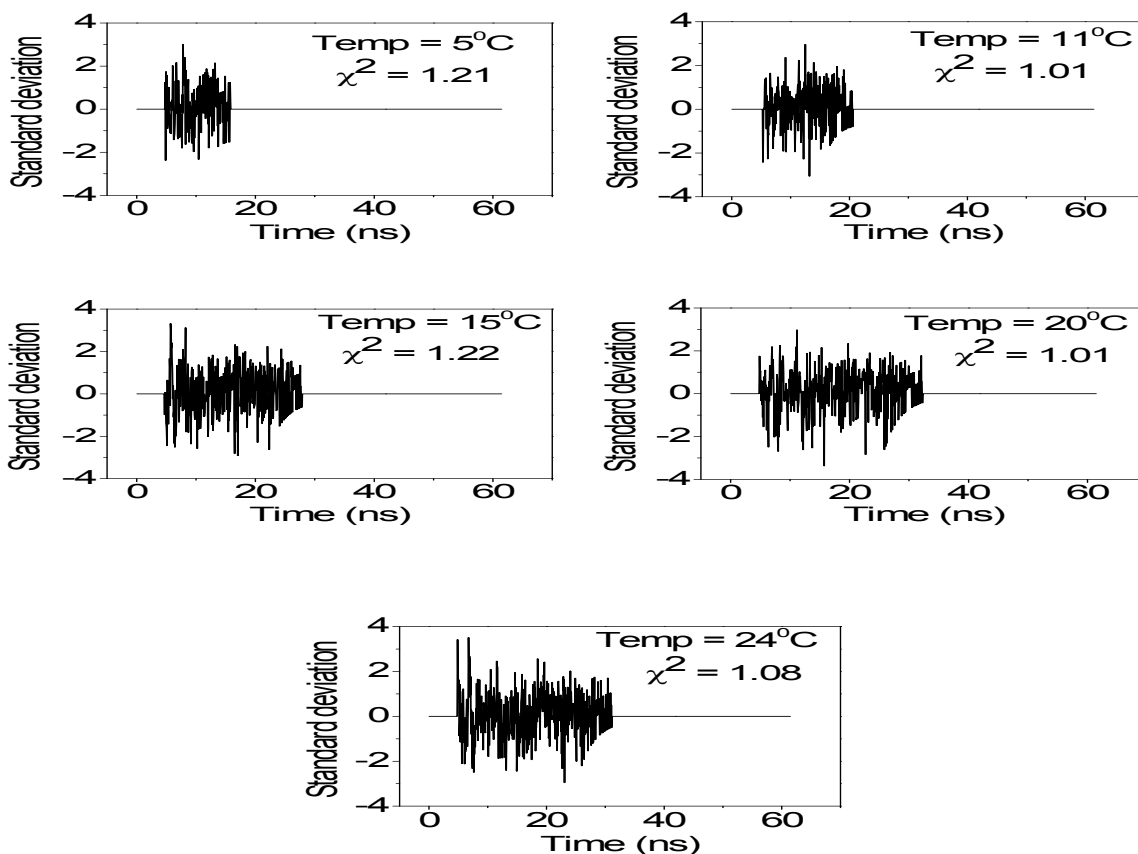

Figure S5: Residue distribution plots of Cum in presence of 10% P123 with increasing temperature (corresponds to Table S3).

Table S4: Fluorescence lifetime data of Cum in presence of 10% F127 with increasing temperature ( $\lambda_{\text{ex}} = 444 \text{ nm}$ ,  $\lambda_{\text{em}} = 480 \text{ nm}$ ).

| Temperature ( $^{\circ}\text{C}$ ) | $\tau_1$ (ns) ( $\beta_1$ ) | $\tau_2$ (ns) ( $\beta_2$ ) | $\tau_{\text{aveg}}$ (ns) | $\chi^2$ |
|------------------------------------|-----------------------------|-----------------------------|---------------------------|----------|
| 13                                 | 0.12 (0.99)                 | 1.28 (0.01)                 | 0.13                      | 1.24     |
| 17                                 | 0.14 (0.99)                 | 1.73 (0.01)                 | 0.16                      | 1.02     |
| 21                                 | 0.49 (0.76)                 | 2.12 (0.24)                 | 0.88                      | 1.21     |
| 27                                 | 0.57 (0.74)                 | 2.14 (0.26)                 | 0.98                      | 1.08     |
| 34                                 | 0.48 (0.76)                 | 2.02 (0.24)                 | 0.85                      | 1.10     |

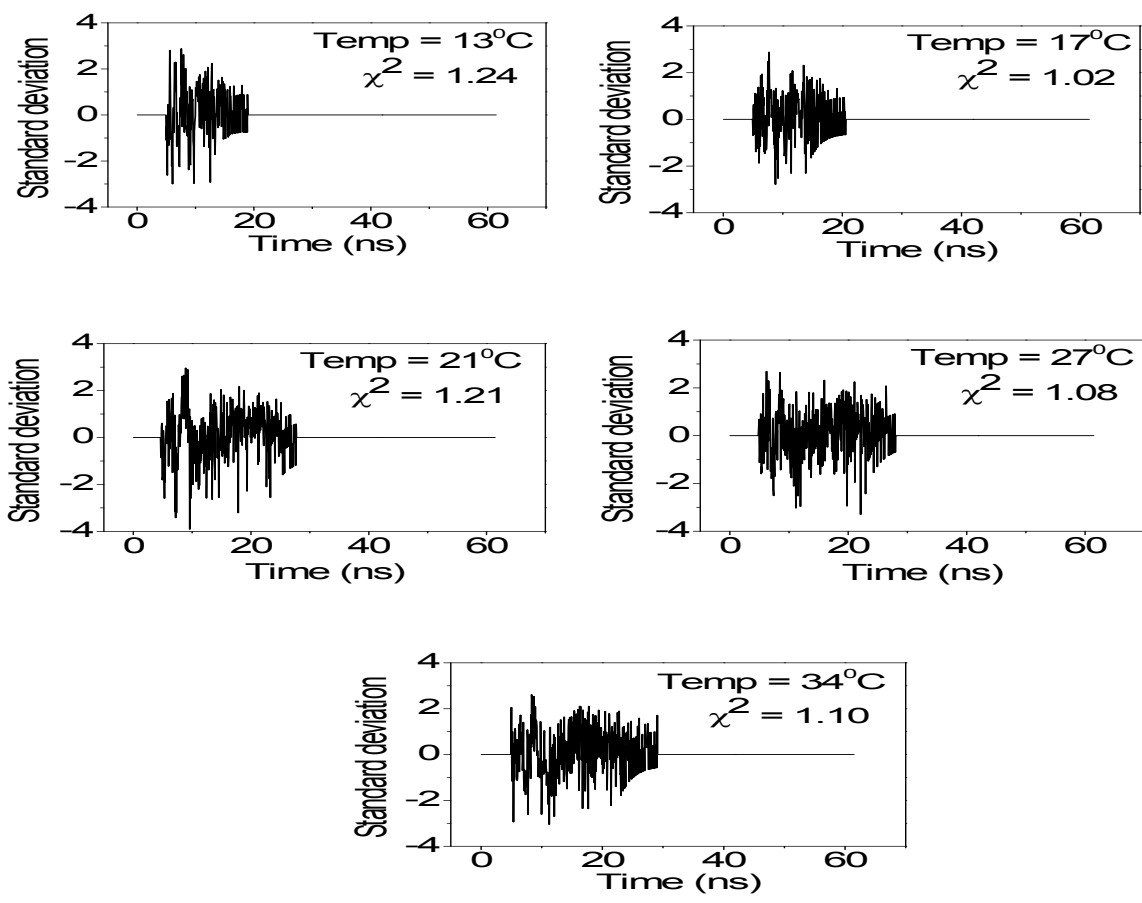

Figure S6: Residue distribution plots of Cum in presence of 10% F127 with increasing temperature (corresponds to Table S4).

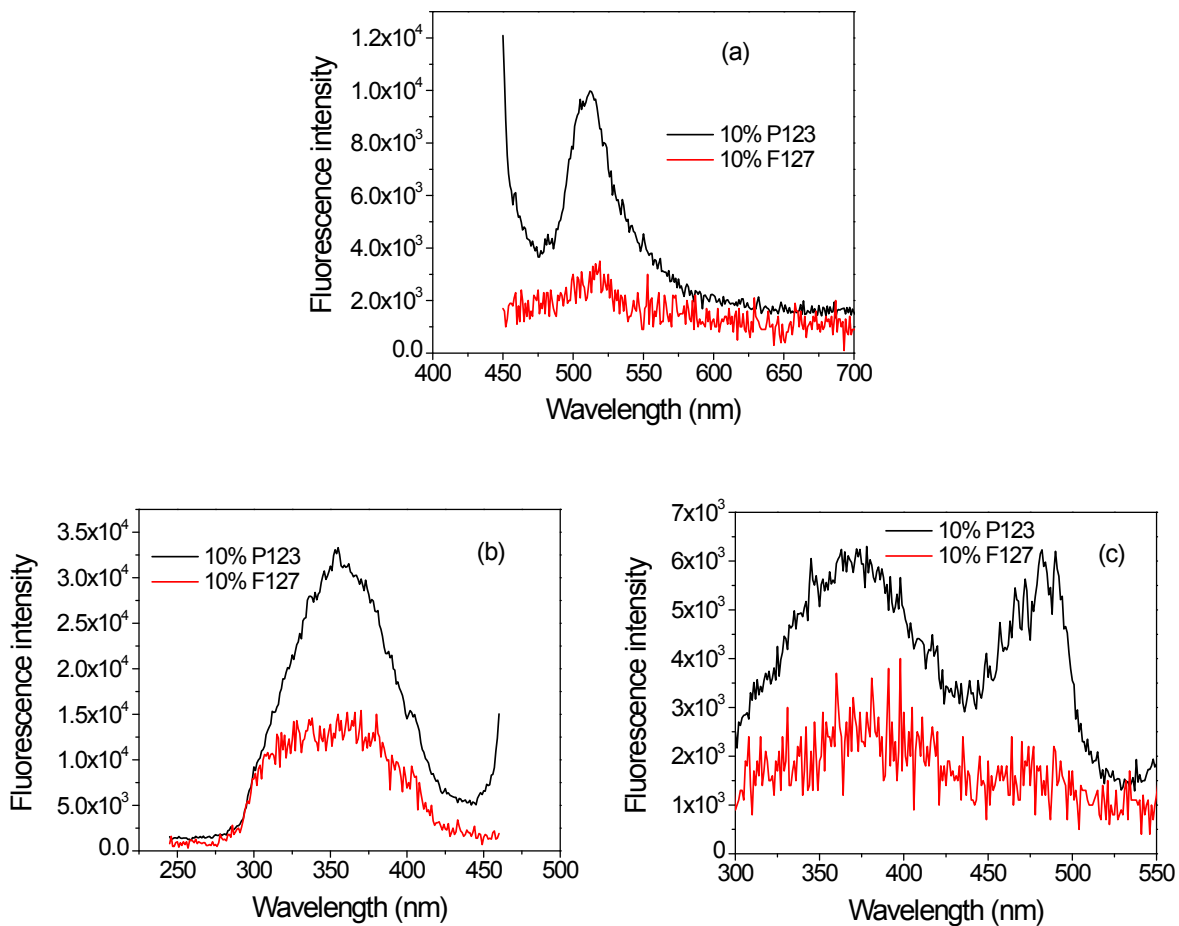

Figure S7: Intrinsic fluorescence of 10% P123 and F127, (a) emission spectra at  $\lambda_{ex}$  440 nm, (b) excitation spectra at  $\lambda_{em}$  470 nm and (c) excitation spectra at  $\lambda_{em}$  566 nm.

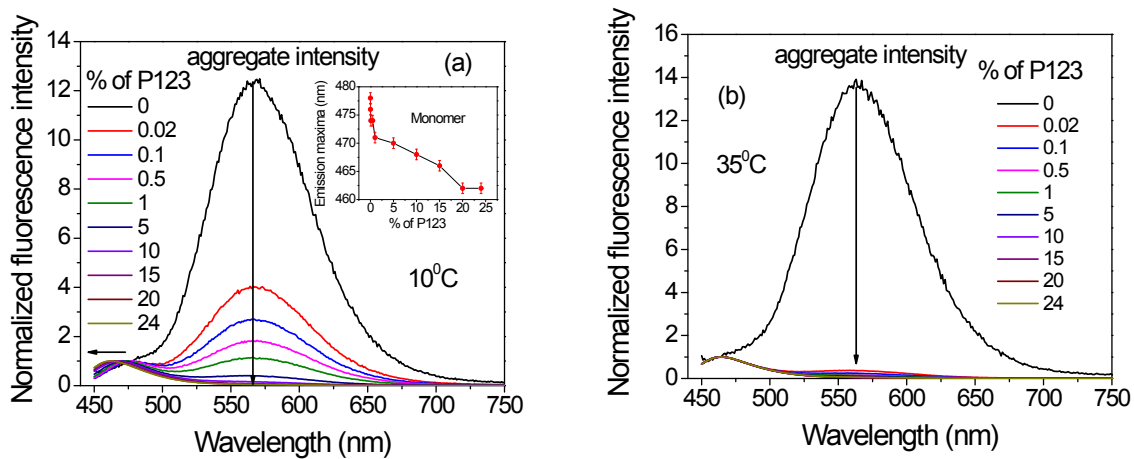

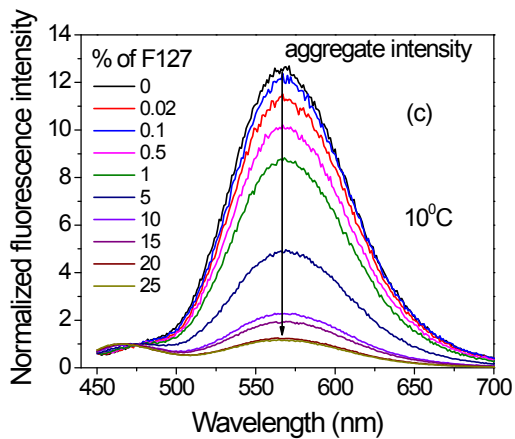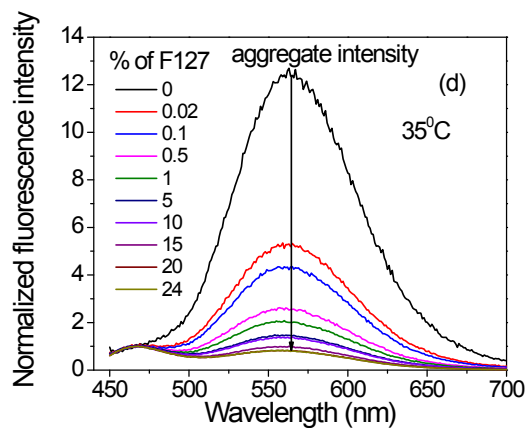

Figure S8: Normalized fluorescence spectra of Cum-Chl, with increasing % of P123 at (a) 10°C and (b) 35°C and with increasing % of F127 at (c) 10°C and (d) 35°C; at  $\lambda_{ex}$  440 nm.

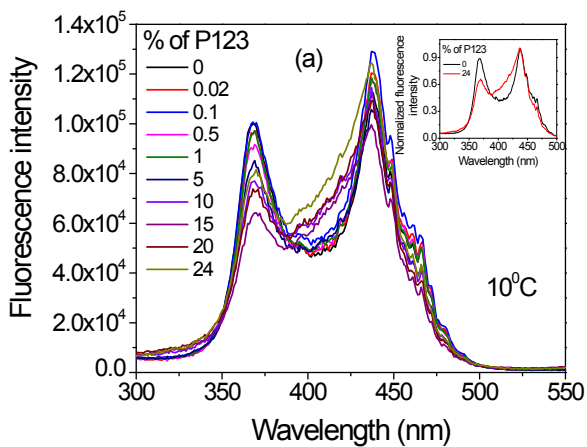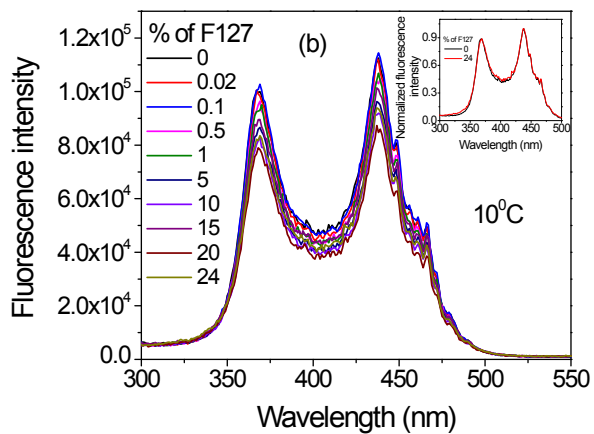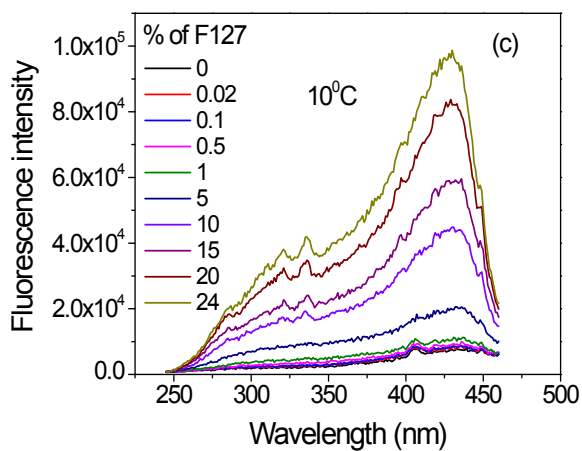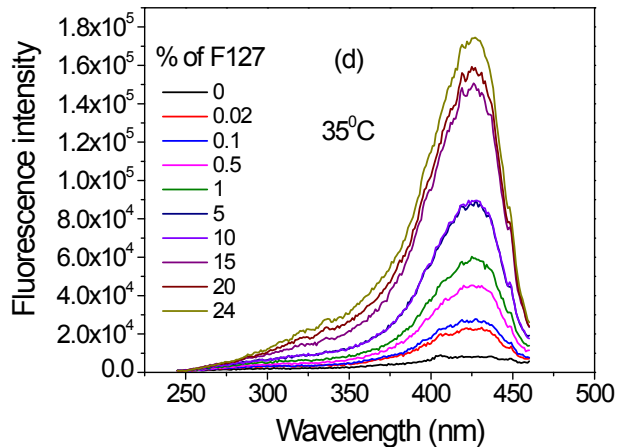



Figure S9: Fluorescence excitation spectra of Cum-Chl ( $\lambda_{em} = 566$  nm) in presence of (a) P123 and (b) F127 at  $10^{\circ}\text{C}$ , inset shows normalized spectra, fluorescence excitation spectra of Cum-Chl ( $\lambda_{em} = 470$  nm) in presence of F127 at (c)  $10^{\circ}\text{C}$  and (d)  $35^{\circ}\text{C}$ .

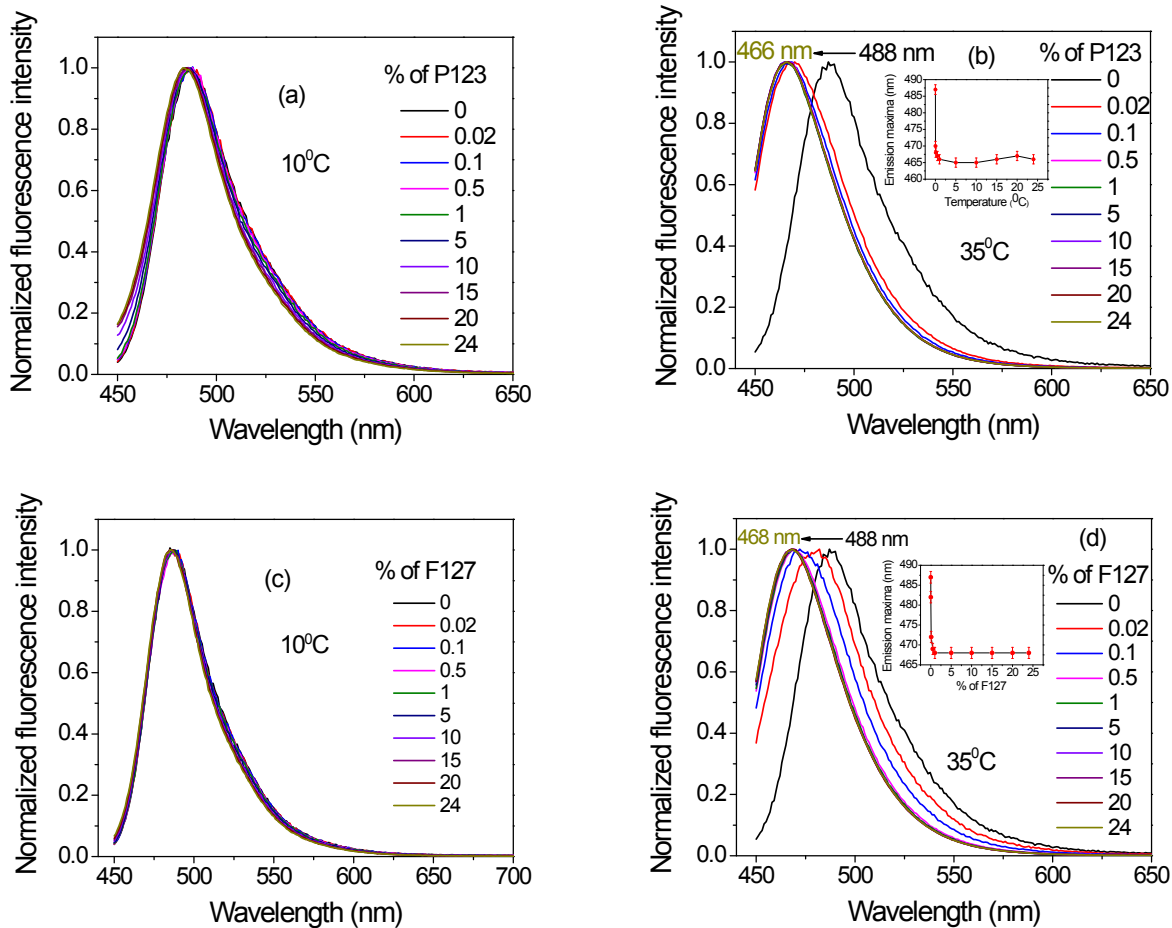

Figure 10: Normalized fluorescence spectra of Cum, with increasing % of P123 at (a) 10°C and (b) 35°C and with increasing % of F127 at (c) 10°C and (d) 35°C; at  $\lambda_{\text{ex}}$  440 nm.
